# Supplementary material for: Prognostic DNA methylation markers for sporadic colorectal cancer: a systematic review
Source: Springer Nature journal article supplement (doi:10.1186/s13148-018-0461-8), 2018-03-14
Supplement: MOESM3 [file 13148_2018_461_MOESM3_ESM.xlsx]

## Sheet: Sheet1
Additional file 3: Table S3. Characteristics of 83 included studies.
Study [ref.]	Marker	Gene	N study population	Cancer Type	Sample type	Stage	Study design	Year of inclusion	N survival analysis	Endpoint	Prognosis measurement	Subgroup	P-value (KM)	HR univariate	LCI univariate	UCI univariate	HR multivariate	LCI multivariate	UCI multivariate	Category	REMARK score
Gaedcke et al. 2014 [40]	Multimarker	ADAP1, BARHL2, CABLES2, DOT1L, ERAS, ESRG, RNF220, ST6GALC5, TAF4, SLC20A2	71	Rectal	PT	I-IV			71	DFS	KM, Cox	Based on the methylation pattern of their tumor, patients were assigned to one or two clusters (good or bad prognosis)	0.03				3.57	1.01	12.55	3	12
	Multimarker	ADAP1, BARHL2, CABLES2, DOT1L, ERAS, ESRG, RNF220, ST6GALC5, TAF4, SLC20A2	42	Rectal	PT	I-IV			42	DFS	KM, Cox		0.01				3.78	1.26	11.37	3	12
Luo et al. 2016 [41]	Single marker	AOX-1	256	CRC	Blood	Duke's A-D		2004-2011	256	OS	Cox			0.97	0.67	1.41	1.18	0.79	1.77	2	11.5
	Single marker	RARB2	256	CRC	Blood	Duke's A-D		2004-2011	256	OS	Cox			0.90	0.58	1.40	0.91	0.58	1.44	2	11.5
	Single marker	RERG	256	CRC	Blood	Duke's A-D		2004-2011	256	OS	Cox			0.94	0.64	1.37	0.89	0.59	1.33	2	11.5
	Single marker	ADAMTS9	256	CRC	Blood	Duke's A-D		2004-2011	256	OS	Cox			0.92	0.63	1.35	1.06	0.70	1.60	2	11.5
	Single marker	IRF4	256	CRC	Blood	Duke's A-D		2004-2011	256	OS	Cox			0.93	0.50	1.73	0.78	0.41	1.49	2	11.5
	Single marker	FOXE-1	256	CRC	Blood	Duke's A-D		2004-2011	256	OS	Cox			0.85	0.57	1.27	1.01	0.66	1.54	2	11.5
	Multimarker	≥ 2 of AOX-1, RERG, ADAMTS9, IRF, FOXE-1	256	CRC	Blood	Duke's A-D		2004-2011	256	OS	Cox			0.74	0.47	1.15	1.04	0.65	1.68	2	11.5
Benard et al. 2014 [42]	Single marker	APAF1	88	Rectal	PT	III		1996-1999	78	OS	KM									2	14.5
	Single marker	BCL2	88	Rectal	PT	III		1996-1999	78	OS	KM									2	14.5
	Single marker	TP53 (p53)	88	Rectal	PT	III		1996-1999	78	OS	KM									2	14.5
	Multimarker	APAF1, BCL2	88	Rectal	PT	III		1996-1999	78	LRFS	KM, Cox			0.59	0.33	1.09	0.58	0.28	1.17	2	14.5
	Multimarker	BCL2, TP53 (p53)	88	Rectal	PT	III		1996-1999	78	DRFS	KM, Cox						1.51	0.96	2.38	2	14.5
	Multimarker	APAF1, BCL2, TP53 (p53)	88	Rectal	PT	III		1996-1999	78	OS	KM, Cox		0.054	0.44	0.24	0.89	0.28	0.09	0.83	1	14.5
	Multimarker	APAF1, BCL2, TP53 (p53)	88	Rectal	PT	III		1996-1999	78	CSS	KM, Cox			0.19	0.04	0.68	0.13	0.03	0.67	1	14.5
	Multimarker	APAF1, BCL2, TP53 (p53)	88	Rectal	PT	III		1996-1999	78	DFRS	KM, Cox			0.28	0.16	0.87	0.22	0.05	0.84	1	14.5
	Multimarker	APAF1, BCL2, TP53 (p53)	88	Rectal	PT	III		1996-1999	78	LFRS	KM, Cox			0.14	0.04	1.04	0.07	0.01	1.06	2	14.5
Chen et al. 2009 [43]	Single marker	APC	117	CRC	PT	I-IV		2001-2004	117	OS	Cox						0.378	0.178	0.802	1	8.5
	Single marker	APC	117	CRC	PT	I-IV		2001-2004	117	DS	Cox						0.426	0.190	0.957	1	8.5
	Single marker	MGMT	117	CRC	PT	I-IV		2001-2004	117	OS	Cox						1.332	0.608	2.918	2	8.5
	Single marker	MGMT	117	CRC	PT	I-IV		2001-2004	117	DS	Cox						1.269	0.537	3.003	2	8.5
De Sousa et al. 2011 [44]	Multimarker	ASCL2, APCDD1, AXIN2, DKK1, LGR5	90	CRC	PT	II	Retrospective	1997-2006	90	RFS	KM		1.2-0.3							3	5.5
Kandimalla et al. 2017 [45]	Single marker	ASCL2	65	CC	PT	II		1997-2006	65	RFS	Cox	MSS	0.293							2	15
	Single marker	APCDD1	65	CC	PT	II		1997-2006	65	RFS	Cox	MSS	0.607							2	15
	Single marker	AXIN2	65	CC	PT	II		1997-2006	65	RFS	Cox	MSS	0.005							3	15
	Single marker	DKK1	65	CC	PT	II		1997-2006	65	RFS	Cox	MSS	0.101							2	15
	Multimarker	AXIN2, DKK1	65	CC	PT	II		1997-2006	65	RFS	KM, Cox	MSS	<0.0047				3.84	1.14	12.43	3	15
	Multimarker	AXIN2, DKK1	79	CC	PT	II			79	RFS	KM, Cox	MSS	<0.0004							3	15
Sangplod et al. 2014 [46]	Single marker	BMP6	85	CRC	PT	I-IV		2008-2010	85	PFS			0.63							2	7
Shimizu et al. 2010 [47]	Single marker	BNIP3	112	CRC	PT	I-IV		2000-2003	112	OS	KM, Cox		0.012							3	9
	Single marker	BNIP3	112	CRC	PT	I-IV		2000-2003	79	OS	KM, Cox	II-III	0.039	3.74	1.04	13.43	3.26	0.88	11.98	3	9
	Single marker	BNIP3	112	CRC	PT	I-IV		2000-2003	79	RFS	KM, Cox	II-III	0.16							2	9
Yi et al. 2011 [48]	Single marker	CD109	147	CC	PT	I-IV		1995-2005	147	OS	KM, Cox						1.81	0.94	3.50	2	11
	Single marker	EVL	147	CC	PT	I-IV		1995-2005	147	OS	KM, Cox						2.48	1.07	5.72	3	11
	Single marker	FLNC	147	CC	PT	I-IV		1995-2005	147	OS	KM, Cox						1.49	0.81	2.74	2	11
	Single marker	IGFBP3	147	CC	PT	I-IV		1995-2005	147	OS	KM, Cox						2.58	1.37	4.87	3	11
	Single marker	NRCAM	147	CC	PT	I-IV		1995-2005	147	OS	KM, Cox						0.98	0.53	1.84	2	11
	Multimarker	FLNC+IGFBP3	147	CC	PT	I-IV		1995-2005	147	OS	KM, Cox						3.01	1.44	6.29	3	11
	Multimarker	EVL+IGFBP3	147	CC	PT	I-IV		1995-2005	147	OS	KM, Cox						4.17	1.51	11.52	3	11
	Multimarker	CD109+IGFBP3	147	CC	PT	I-IV		1995-2005	147	OS	KM, Cox						4.19	1.84	9.58	3	11
	Multimarker	EVL+CD109	147	CC	PT	I-IV		1995-2005	147	OS	KM, Cox						4.27	1.43	12.71	3	11
	Multimarker	EVL+CD109+IGFBP3	147	CC	PT	I-IV		1995-2005	147	OS	KM, Cox						7.05	2.07	24.04	3	11
	Multimarker	CD109,EVL,FLNC3, IGFBP3	147	CC	PT	I-IV		1995-2005	147	OS	KM, Cox						8.61	2.16	34.36	3	11
	Single marker	CD109	72	CC	PT	I-IV		1995-2005	72	OS	KM, Cox						1.50	0.95	2.37	2	11
	Single marker	EVL	72	CC	PT	I-IV		1995-2005	72	OS	KM, Cox						1.95	1.17	3.25	3	11
	Single marker	FLNC	72	CC	PT	I-IV		1995-2005	72	OS	KM, Cox						1.11	0.73	1.69	2	11
	Single marker	IGFBP3	72	CC	PT	I-IV		1995-2005	72	OS	KM, Cox						2.04	1.34	3.09	3	11
	Single marker	NRCAM	72	CC	PT	I-IV		1995-2005	72	OS	KM, Cox						0.79	0.53	1.19	2	11
	Multimarker	FLNC+IGFBP3	72	CC	PT	I-IV		1995-2005	72	OS	KM, Cox						2.09	1.24	3.53	3	11
	Multimarker	EVL+IGFBP3	72	CC	PT	I-IV		1995-2005	72	OS	KM, Cox						2.21	1.21	4.04	3	11
	Multimarker	CD109+IGFBP3	72	CC	PT	I-IV		1995-2005	72	OS	KM, Cox						2.90	1.64	5.15	3	11
	Multimarker	EVL+CD109	72	CC	PT	I-IV		1995-2005	72	OS	KM, Cox						2.67	1.35	5.21	3	11
	Multimarker	EVL+CD109+IGFBP3	72	CC	PT	I-IV		1995-2005	72	OS	KM, Cox						3.10	1.43	6.74	3	11
	Multimarker	CD109,EVL,FLNC3, IGFBP3	72	CC	PT	I-IV		1995-2005	72	OS	KM, Cox						3.07	1.17	8.07	3	11
	Single marker	EVL	558	CC	PT	I-IV		1989-1994	558	OS	KM, Cox						1.41	1.05	1.89	3	11
	Single marker	CD109	558	CC	PT	I-IV		1989-1994	558	OS	KM, Cox						1.19	0.95	1.48	2	11
	Single marker	IGFBP3	558	CC	PT	I-IV		1989-1994	558	OS	KM, Cox									2	11
	Single marker	CD109	76	CC	PT	II		1995-2005	76	OS	KM, Cox						2.41	1.14	5.10	3	11
	Single marker	EVL	76	CC	PT	II		1995-2005	76	OS	KM, Cox						1.45	0.55	3.78	2	11
	Single marker	FLNC	76	CC	PT	II		1995-2005	76	OS	KM, Cox						0.90	0.43	1.86	2	11
	Single marker	IGFBP3	76	CC	PT	II		1995-2005	76	OS	KM, Cox						3.02	1.42	6.40	3	11
	Single marker	NRCAM	76	CC	PT	II		1995-2005	76	OS	KM, Cox						1.29	0.61	2.75	2	11
	Multimarker	EVL+IGFBP3	76	CC	PT	II		1995-2005	76	OS	KM, Cox						2.30	0.70	7.61	2	11
	Multimarker	CD109+IGFBP3	76	CC	PT	II		1995-2005	76	OS	KM, Cox						5.85	2.03	16.83	3	11
	Multimarker	EVL+CD109	76	CC	PT	II		1995-2005	76	OS	KM, Cox						2.50	0.71	8.83	2	11
	Multimarker	EVL+CD109+IGFBP3	76	CC	PT	II		1995-2005	76	OS	KM, Cox						4.82	0.90	25.68	2	11
Wang et al. 2012 [49]	Single marker	CDH13	85	CRC	PT	II		2002-2005	85	OS	KM, Cox		0.008							3	10
	Single marker	FBLN3	85	CRC	PT	II		2002-2005	85	OS	KM, Cox		0.022							3	10
	Multimarker	CDH13 and/or FBLN3	85	CRC	PT	II		2002-2005	85	OS	KM, Cox		0.001							3	10
	Single marker	MLH1 (hMLH1)	85	CRC	PT	II		2002-2005	85	OS	KM, Cox		0.046							1	10
Liang et al. 1999 [50]	Single marker	CDKN2A (p16)	84	CRC	PT	II		1991-1993			KM		0.0001							3	9.5
Esteller et al. 2001 [51]	Single marker	CDKN2A (p16)	119	CRC	PT	Duke's A-D	Prospective collection	1991-1994	90	OS	KM, Cox	Patients with curative resection only (excl. dukes D), either methylation or KRAS mutation	0.037				3.0	1.1	8.1	3	9
	Single marker	CDKN2A (p16)	119	CRC	PT	Duke's A-D	Prospective collection	1991-1994	90	DFS											9
Maeda et al. 2003 [52]	Single marker	CDKN2A (p16)	90	CRC	PT	Duke's B-C			90	OS	KM, Cox	Patient with curative resection	0.022							3	6.5
	Single marker	CDKN2A (p16)	90	CRC	PT	Duke's B-C			90	OS	KM, Cox	Duke stage C	0.057							2	6.5
Sanz-Casla et al. 2005 [53]	Single marker	CDKN2A (p16)	104	CRC	PT	II-III	Prospective	1995-1998		OS	KM		0.09							2	9.5
	Single marker	CDKN2A (p16)	104	CRC	PT	I-IV	Prospective	1995-1998		DFS	KM		0.3							2	9.5
Nakayama et al. 2007 [54]	Single marker	CDKN2A (p16)	168	CRC	Serum	I-IV			99		KM	Serum samples of p16 methylation-positive PT of CRC patients	0.006							3	7
Wettergren et al. 2008 [55]	Single marker	CDKN2A (p16)	181	CRC	Mucosa	Duke's A-C		1994-2004	134	CSS	KM, Cox	Duke’s A-C	0.007				2.9	1.3	6.2	3	11.5
	Single marker	CDKN2A (p16)	181	CRC	Mucosa	Duke's A-C		1994-2004	71	CSS	KM, Cox	Duke’s B	0.035				4.7	1.1	19.5	3	11.5
	Single marker	CDKN2A (p16)	181	CRC	Mucosa	Duke's A-C		1994-2004	53	CSS	KM, Cox	Duke’s C	0.22				2.0	0.67	5.9	2	11.5
	Single marker	CDKN2A (p16)	181	CRC	Mucosa	Duke's A-C		1994-2004	134	DFS	KM, Cox	Duke’s A-C	0.015				2.5	1.2	5.1	3	11.5
	Single marker	CDKN2A (p16)	181	CRC	Mucosa	Duke's A-C		1994-2004	71	DFS	KM, Cox	Duke’s B	0.060				3.2	0.95	11	2	11.5
	Single marker	CDKN2A (p16)	181	CRC	Mucosa	Duke's A-C		1994-2004	53	DFS	KM, Cox	Duke’s C	0.30				1.8	0.60	5.4	2	11.5
Wettergren et al. 2010 [56]	Single marker	CDKN2A (p16)	180	CRC	Mucosa	I-IV		1994-2004		CSS	Cox	Stage I-III					2.6	1.2	5.7	3	11
	Single marker	CDKN2A (p16)	180	CRC	Mucosa	I-IV		1994-2004		DFS	Cox	Stage I-III					2.2	1.1	4.4	3	11
Malhotra et al. 2010 [57]	Single marker	CDKN2A (p16)	30	CRC	PT	I-IV	Prospective collection	2004-2006	29	OS	KM		>0.05							2	7.5
Mitomi et al. 2010 [58]	Single marker	CDKN2A (p16)	151	CRC	PT	II-IV		1996-2001	151	CSS	KM, Cox	Intermediate methylation (N=54)		1.819	0.889	3.724	1.852	0.901	3.81	2	13.5
	Single marker	CDKN2A (p16)	151	CRC	PT	II-IV		1996-2001	151	CSS	KM, Cox	High methylation (N=46)	0.002	2.953	1.487	5.863	3.379	1.668	6.843	3	13.5
	Single marker	CDKN2A (p16)	151	CRC	PT	II-IV		1996-2001	127	RFS	KM, Cox	Intermediate methylation (N=54)		1.939	0.959	3.921	2.095	1.033	4.247	3	13.5
	Single marker	CDKN2A (p16)	151	CRC	PT	II-IV		1996-2001	127	RFS	KM, Cox	High methylation (N=46)	0.001	3.121	1.584	6.15	3.962	1.987	7.903	3	13.5
Shima et al. 2011 [59]	Single marker	CDKN2A (p16)	902	CRC	PT	I-IV	Prospective	1967-2002	902	OS	KM, Cox		0.0035	1.36	1.10	1.66	1.03	0.82	1.31	2	16
	Single marker	CDKN2A (p16)	902	CRC	PT	I-IV	Prospective	1967-2002	902	CSS	KM, Cox			1.17	0.89	1.54	0.85	0.61	1.18	2	16
Bihl et al. 2012 [60]	Single marker	CDKN2A (p16)	432	CRC	PT	I-IV			422		KM, Cox		0.0003	1.36	1.1	1.8	1.66	1.2	2.3	3	9
Veganzones-de-Castro et al. 2012 [61]	Single marker	CDKN2A (p16)	326	CRC	PT	I-IV	Prospective	1995-2003	318	OS	KM, Cox		0.06	0.91	0.58	1.42				2	12.5
	Single marker	CDKN2A (p16)	326	CRC	PT	I-IV	Prospective	1995-2003	318	DFS	KM, Cox			0.73	0.3	1.3				2	12.5
Kohonen-Corish et al. 2014 [62]	Single marker	CDKN2A (p16)	381	Rectal	PT	B,C	Prospective	1988-2001		OS	KM, Cox	Stage B and C	0.008	1.5						3	12
	Single marker	CDKN2A (p16)	381	Rectal	PT	B,C	Prospective	1988-2001		OS	KM, Cox	Stage B	0.181	1.4						2	12
	Single marker	CDKN2A (p16)	381	Rectal	PT	B,C	Prospective	1988-2001		OS	KM, Cox	Stage C	>0.02				1.5	0.99	2.1	2	12
	Single marker	CDKN2A (p16)	381	Rectal	PT	B,C	Prospective	1988-2001		OS	KM, Cox	Stage C and KRAS mutant	<0.04				2.6	1.5	4.4	3	12
	Single marker	CDKN2A (p16)	381	Rectal	PT	B,C	Prospective	1988-2001		CSS		Stage C and KRAS mutant					2.0	1.2	3.5	3	12
Ishiguro et al. 2006 [63]	Single marker	CDKN2A (p16)	88	CRC	PT	I-IV				OS	KM		0.563							2	9
	Single marker	CDKN2B (p15)	88	CRC	PT	I-IV				OS	KM		0.781							2	9
	Single marker	CDKN2B (p15)	88	CRC	PT	I-IV				OS	KM	I-II	0.018							3	9
Miladi-Abdennadher et al. 2011 [64]	Single marker	CDKN2A (p16)	72	CRC	PT	I-IV		2003-2007	38	OS	KM, Cox		0.185				3.308	0.663	16.497	2	12
	Single marker	MLH1 (hMLH1)	72	CRC	PT	I-IV		2003-2007	38	OS	KM, Cox						0.120	0.026	4.977	2	12
Iida et al. 2012 [65]	Single marker	CDKN2A (p16)	165	CRC	PT	I-IV		2000-2003		DSS	KM, Cox			1.950	0.912	4.169				2	11.5
	Single marker	MLH1 (hMLH1)	165	CRC	PT	I-IV		2000-2003		DSS	KM, Cox			2.231	1.000	4.977				3	11.5
	Single marker	BNIP3	165	CRC	PT	I-IV		2000-2003		DSS	KM, Cox			2.23	0.944	5.284				2	11.5
	Multimarker	2 or 3 genes methylated (CDKN2A, BNIP3, MLH1)	165	CRC	PT	I-IV		2000-2003		DSS	KM, Cox			2.681	1.253	5.747				3	11.5
	Multimarker	2 or 3 genes methylated (CDKN2A, BNIP3, MLH1) + PI3CA mutant	165	CRC	PT	I-IV		2000-2003		DSS	KM, Cox			2.924	1.312	6.494	2.793	1.220	6.410	3	11.5
Veganzones et al. 2015 [66]	Multimarker	CDKN2A, MLH1 (CMETH2)	51	CRC	PT	I-IV	Prospective collection	1995-2003	51	OS	KM, Cox		0.04	0.607	0.13	3.2				2	12
	Multimarker	CDKN2A , hMLH1 (CMETH2)	51	CRC	PT	I-IV	Prospective collection	1995-2003	51	DFS	KM, Cox			0.028	0.0	42.1				2	12
Krtolica et al. 2007 [67]	Multimarker	CDKN2A (p16), MGMT	85	CRC	PT	I-IV			41	OS	KM, Cox		0.072							2	9.5
Kamiyama et al. 2009 [68]	Multimarker	CDKN2A (p16), MGMT, CDH1, APC	51	CRC	PLF	I-IV		2004-2006	33	RFS	KM		0.0002							3	8.5
Kuan et al. 2015 [69]	Single marker	CDKN2A (p16)	215	CRC	PT	III-IV				recurrence	KM, Cox			9.64	2.92	31.81				3	11
	Single marker	MLH1 (hMLH1)	215	CRC	PT	III-IV				recurrence	KM, Cox			8.29	3.40	20.22				3	11
	Single marker	MGMT	215	CRC	PT	III-IV				recurrence	KM, Cox			11.83	3.45	40.12				3	11
Yang et al. 2014 [70]	Multimarker	CDKN2A (p16), IGFBP7, KLOTHO, MLH1, PHD3, SFRP2	184	CRC	PT	I-IV		2008-2011	184	mortality	Cox									2	10.5
	Single marker	CDKN2A (p16)	184	CRC	PT	I-IV		2008-2011	184	mortality	Cox									2	10.5
	Single marker	IGFBP7	184	CRC	PT	I-IV		2008-2011	184	mortality	Cox									2	10.5
	Single marker	KL (KLOTHO)	184	CRC	PT	I-IV		2008-2011	184	mortality	Cox									2	10.5
	Single marker	hMLH1 (MLH1)	184	CRC	PT	I-IV		2008-2011	184	mortality	Cox									2	10.5
	Single marker	EGLN3 (PHD3)	184	CRC	PT	I-IV		2008-2011	184	mortality	Cox									2	10.5
	Single marker	SFRP2	184	CRC	PT	I-IV		2008-2011	184	mortality	Cox									2	10.5
Jiang et al. 2016 [71]	Single marker	CDX2	108	CRC	PT	I-IV		2000-2001	72	survival	KM, Cox		0.0273				3.021	1.212	5.038	3	9.5
Tanaka et al. 2011 [72]	Single marker	CHFR	82	CC	PT	II-III	Retrospective	1999-2007	82	RFS	KM, Cox	U vs M	0.240				2.99	1.23	7.23	3	14.5
	Single marker	CHFR	82	CC	PT	II-III	Retrospective	1999-2007	82	RFS	KM, Cox	methylation neg./low vs. high (>30)	0.006							3	14.5
	Single marker	CHFR	82	CC	PT	II-III	Retrospective	1999-2007	28	RFS	KM, Cox	methylation neg./low vs. high (>30) in stage II	0.661				1.45	0.30	6.88	2	14.5
	Single marker	CHFR	82	CC	PT	II-III	Retrospective	1999-2007	54	RFS	KM, Cox	methylation neg./low vs. high (>30) in stage III	0.004				4.13	1.34	12.8	3	14.5
	Single marker	CHFR	82	CC	PT	II-III	Retrospective	1999-2007	82	OS	KM, Cox	methylation neg./low vs. high (>30)	0.069							2	14.5
	Single marker	CHFR	82	CC	PT	II-III	Retrospective	1999-2007		OS	KM, Cox		0.558							2	14.5
	Single marker	ID4	82	CC	PT	II-III	Retrospective	1999-2007		RFS	KM, Cox		0.850							2	14.5
	Single marker	ID4	82	CC	PT	II-III	Retrospective	1999-2007		OS	KM, Cox		0.118							2	14.5
	Single marker	MINT4	82	CC	PT	II-III	Retrospective	1999-2007		RFS	KM, Cox		0.190							2	14.5
	Single marker	MINT4	82	CC	PT	II-III	Retrospective	1999-2007		OS	KM, Cox		0.535							2	14.5
	Single marker	RECK	82	CC	PT	II-III	Retrospective	1999-2007		RFS	KM, Cox		0.087							2	14.5
	Single marker	RECK	82	CC	PT	II-III	Retrospective	1999-2007		OS	KM, Cox		0.242							2	14.5
Cleven et al. 2014 [73]	Single marker	CHFR	173	CRC	PT	I-IV		1979-1981	166	CSS	KM, Cox	overall		1.33	0.81	2.20				2	17.5
	Single marker	CHFR	173	CRC	PT	I-IV		1979-1981	66	CSS	KM, Cox	stage II, MSS, BRAFwt	0.02	2.59	1.16	5.76	3.89	1.58	9.60	3	17.5
	Single marker	CHFR	173	CRC	PT	I-IV		1979-1981		CSS	KM, Cox	stage III, MSS, BRAFwt		1.33	0.50	3.57				2	17.5
	Single marker	CHFR	569	CRC	PT	I-IV	Prospective collection	1989-1994	136	CSS	KM, Cox	stage II, MSS, BRAFwt	0.10				2.11	0.95	4.69	2	17.5
	Single marker	PLOD1 (LH1)	173	CRC	PT	I-IV		1979-1981	166	CSS	KM, Cox	overall		0.92	0.53	1.59				2	17.5
	Single marker	PLOD1 (LH1)	173	CRC	PT	I-IV		1979-1981	66	CSS	KM, Cox	stage II, MSS, BRAFwt		0.65	0.25	1.73				2	17.5
	Single marker	PLOD1 (LH1)	173	CRC	PT	I-IV		1979-1981		CSS	KM, Cox	stage III, MSS, BRAFwt		0.91	0.26	3.21				2	17.5
	Single marker	CDKN2A (p16)	173	CRC	PT	I-IV		1979-1981	166	CSS	KM, Cox	overall		1.17	0.71	1.92				2	17.5
	Single marker	CDKN2A (p16)	173	CRC	PT	I-IV		1979-1981	66	CSS	KM, Cox	stage II, MSS, BRAFwt		0.88	0.40	1.91				2	17.5
	Single marker	CDKN2A (p16)	173	CRC	PT	I-IV		1979-1981		CSS	KM, Cox	stage III, MSS, BRAFwt		1.84	0.68	4.90				2	17.5
	Single marker	CDKN2A (p14ARF)	173	CRC	PT	I-IV		1979-1981	166	CSS	KM, Cox	overall		1.28	0.78	2.08				2	17.5
	Single marker	CDKN2A (p14ARF)	173	CRC	PT	I-IV		1979-1981	66	CSS	KM, Cox	stage II, MSS, BRAFwt		1.40	0.65	3.03				2	17.5
	Single marker	CDKN2A (p14ARF)	173	CRC	PT	I-IV		1979-1981		CSS	KM, Cox	stage III, MSS, BRAFwt		1.49	0.55	4.0				2	17.5
	Single marker	MGMT	173	CRC	PT	I-IV		1979-1981	166	CSS	KM, Cox	overall		1.62	0.99	2.68				2	17.5
	Single marker	MGMT	173	CRC	PT	I-IV		1979-1981	66	CSS	KM, Cox	stage II, MSS, BRAFwt		1.66	0.77	3.58				2	17.5
	Single marker	MGMT	173	CRC	PT	I-IV		1979-1981		CSS	KM, Cox	stage III, MSS, BRAFwt		1.56	0.58	4.2				2	17.5
	Single marker	RASSF1 (RASSF1A)	173	CRC	PT	I-IV		1979-1981	166	CSS	KM, Cox	overall		1.20	0.65	2.21				2	17.5
	Single marker	RASSF1 (RASSF1A)	173	CRC	PT	I-IV		1979-1981	66	CSS	KM, Cox	stage II, MSS, BRAFwt		0.76	0.30	1.88				2	17.5
	Single marker	RASSF1 (RASSF1A)	173	CRC	PT	I-IV		1979-1981		CSS	KM, Cox	stage III, MSS, BRAFwt		3.89	1.23	12.3				3	17.5
	Single marker	APC	173	CRC	PT	I-IV		1979-1981	166	CSS	KM, Cox	overall		1.30	0.78	2.15				2	17.5
	Single marker	APC	173	CRC	PT	I-IV		1979-1981	66	CSS	KM, Cox	stage II, MSS, BRAFwt		2.63	1.21	5.68				3	17.5
	Single marker	APC	173	CRC	PT	I-IV		1979-1981		CSS	KM, Cox	stage III, MSS, BRAFwt		0.59	0.19	1.84				2	17.5
	Single marker	HLTF	173	CRC	PT	I-IV		1979-1981	166	CSS	KM, Cox	overall		1.05	0.64	1.73				2	17.5
	Single marker	HLTF	173	CRC	PT	I-IV		1979-1981	66	CSS	KM, Cox	stage II, MSS, BRAFwt		1.43	0.65	3.15				2	17.5
	Single marker	HLTF	173	CRC	PT	I-IV		1979-1981		CSS	KM, Cox	stage III, MSS, BRAFwt		2.16	0.78	5.96				2	17.5
	Single marker	GATA4	173	CRC	PT	I-IV		1979-1981	166	CSS	KM, Cox	overall		0.92	0.56	1.50				2	17.5
	Single marker	GATA4	173	CRC	PT	I-IV		1979-1981	66	CSS	KM, Cox	stage II, MSS, BRAFwt		0.89	0.41	1.93				2	17.5
	Single marker	GATA4	173	CRC	PT	I-IV		1979-1981		CSS	KM, Cox	stage III, MSS, BRAFwt		1.22	0.46	3.25				2	17.5
	Single marker	GATA5	173	CRC	PT	I-IV		1979-1981	166	CSS	KM, Cox	overall		1.20	0.71	2.02				2	17.5
	Single marker	GATA5	173	CRC	PT	I-IV		1979-1981	66	CSS	KM, Cox	stage II, MSS, BRAFwt		1.40	0.60	3.28				2	17.5
	Single marker	GATA5	173	CRC	PT	I-IV		1979-1981		CSS	KM, Cox	stage III, MSS, BRAFwt		1.46	0.53	4.02				2	17.5
	Single marker	ADAM23	173	CRC	PT	I-IV		1979-1981	166	CSS	KM, Cox	overall		0.99	0.59	1.69				2	17.5
	Single marker	ADAM23	173	CRC	PT	I-IV		1979-1981	66	CSS	KM, Cox	stage II, MSS, BRAFwt		1.49	0.64	3.49				2	17.5
	Single marker	ADAM23	173	CRC	PT	I-IV		1979-1981		CSS	KM, Cox	stage III, MSS, BRAFwt		1.11	0.42	2.99				2	17.5
	Single marker	RAB32	173	CRC	PT	I-IV		1979-1981	166	CSS	KM, Cox	overall		0.56	0.20	1.53				2	17.5
	Single marker	RAB32	173	CRC	PT	I-IV		1979-1981	66	CSS	KM, Cox	stage II, MSS, BRAFwt		0.05	0.00	4.43				2	17.5
	Single marker	RAB32	173	CRC	PT	I-IV		1979-1981		CSS	KM, Cox	stage III, MSS, BRAFwt		0.45	0.06	3.40				2	17.5
	Single marker	JPH3	173	CRC	PT	I-IV		1979-1981	166	CSS	KM, Cox	overall		1.14	0.67	1.93				2	17.5
	Single marker	JPH3	173	CRC	PT	I-IV		1979-1981	66	CSS	KM, Cox	stage II, MSS, BRAFwt		1.75	0.70	4.35				2	17.5
	Single marker	JPH3	173	CRC	PT	I-IV		1979-1981		CSS	KM, Cox	stage III, MSS, BRAFwt		1.31	0.46	3.81				2	17.5
	Single marker	FOXL2	173	CRC	PT	I-IV		1979-1981	166	CSS	KM, Cox	overall		0.90	0.53	1.53				2	17.5
	Single marker	FOXL2	173	CRC	PT	I-IV		1979-1981	66	CSS	KM, Cox	stage II, MSS, BRAFwt		0.92	0.39	2.20				2	17.5
	Single marker	FOXL2	173	CRC	PT	I-IV		1979-1981		CSS	KM, Cox	stage III, MSS, BRAFwt		0.97	0.33	2.84				2	17.5
	Single marker	BNIP3	173	CRC	PT	I-IV		1979-1981	166	CSS	KM, Cox			0.94	0.58	1.55				2	17.5
	Single marker	BNIP3	173	CRC	PT	I-IV		1979-1981	66	CSS	KM, Cox	Stage II, MSS, BRAFwt		0.86	0.39	1.88				2	17.5
	Single marker	BNIP3	173	CRC	PT	I-IV		1979-1981		CSS	KM, Cox	Stage III, MSS, BRAFwt		1.08	0.38	3.12				2	17.5
	Single marker	NEURL1 (NEURL)	173	CRC	PT	I-IV		1979-1981	166	CSS	KM, Cox			0.78	0.41	1.50				2	17.5
	Single marker	NEURL1 (NEURL)	173	CRC	PT	I-IV		1979-1981	66	CSS	KM, Cox	Stage II, MSS, BRAFwt		1.83	0.77	4.36				2	17.5
	Single marker	NEURL1 (NEURL)	173	CRC	PT	I-IV		1979-1981		CSS	KM, Cox	Stage III, MSS, BRAFwt		0.78	0.18	3.43				2	17.5
	Single marker	CAC2D1 (CAC2)	173	CRC	PT	I-IV		1979-1981	166	CSS	KM, Cox			0.99	0.56	1.77				2	17.5
	Single marker	CAC2D1 (CAC2)	173	CRC	PT	I-IV		1979-1981	66	CSS	KM, Cox	Stage II, MSS, BRAFwt		0.70	0.24	2.05				2	17.5
	Single marker	CAC2D1 (CAC2)	173	CRC	PT	I-IV		1979-1981		CSS	KM, Cox	Stage III, MSS, BRAFwt		2.18	0.68	7.00				2	17.5
	Single marker	THBS1	173	CRC	PT	I-IV		1979-1981	166	CSS	KM, Cox			1.12	0.35	3.59				2	17.5
	Single marker	THBS1	173	CRC	PT	I-IV		1979-1981	66	CSS	KM, Cox	Stage II, MSS, BRAFwt		0.48	0.00	6.83				2	17.5
	Single marker	THBS1	173	CRC	PT	I-IV		1979-1981		CSS	KM, Cox	Stage III, MSS, BRAFwt		26.5	1.66	42.3				3	17.5
	Single marker	TFPI2	173	CRC	PT	I-IV		1979-1981	166	CSS	KM, Cox			1.35	0.58	3.16				2	17.5
	Single marker	TFPI2	173	CRC	PT	I-IV		1979-1981	66	CSS	KM, Cox	Stage II, MSS, BRAFwt		1.40	0.32	5.95				2	17.5
	Single marker	TFPI2	173	CRC	PT	I-IV		1979-1981		CSS	KM, Cox	Stage III, MSS, BRAFwt		0.98	0.22	4.42				2	17.5
Wang et al. 2015 [74]	Single marker	DACT2	67	CC	PT	I-IV			67	OS	KM, Cox						4.590	1.542	13.660	3	7
	Single marker	DACT2	67	CC	PT	I-IV			54	OS	KM, Cox	Stage I-III	0.009							3	7
	Single marker	DACT2	67	CC	PT	I-IV			13	OS	KM, Cox	Stage IV	>0.05							2	7
Cui et al. 2011 [75]	Single marker	DSC3	99	CRC	PT	I-III			99		KM		0.002							3	8
Rawluszko-Wieczorek et al. 2014 [76]	Single marker	EPAS1	71	CC	PT	I-III	Retrospective	2009-2013	71	OS	KM, Cox		0.87				33.94	2.84	405.95	3	12
	Single marker	EPAS1	71	CC	PT	I-III	Retrospective	2009-2013	71	DFS	KM, Cox						1.62	0.32	8.36	3	12
Xu et al. 2015 [77]	Single marker	FBLN1	68	CRC	PT	I-IV		2008-2009		OS	KM		0.011							3	9.5
Wallner et al. 2006 [78]	Single marker	HLTF	104	CRC	Serum	I-IV		1991-1997	77	OS	KM, Cox		0.003	3.0	1.4	6.4				2	15
	Single marker	HPP1	104	CRC	Serum	I-IV		1991-1997	77	OS	KM, Cox		<0.001	5.1	2.2	11.6				2	15
	Single marker	MLH1 (hMLH1)	104	CRC	Serum	I-IV		1991-1997	77	OS	KM, Cox			1.4	0.6	3.1				2	15
	Multimarker	HLTF and/or HPP1	104	CRC	Serum	I-IV		1991-1997	77	OS	KM, Cox		0.003	4.2	2.0	9.0	3.4	1.4	8.1	3	15
Herbst et al. 2009 [79]	Single marker	HLTF	106	CRC	Serum	I-III		1992-1999		RFS	KM, Cox			2.7	1.2	6.0	2.5	1.1	5.6	3	14.5
	Single marker	HPP1	106	CRC	Serum	I-III		1992-1999		RFS	KM, Cox			2.9	1.0	8.3				3	14.5
	Multimarker	HLTF and/or HPP1	106	CRC	Serum	I-III		1992-1999		RFS	KM, Cox			2.9	1.4	6.1				3	14.5
Philipp et al. 2012 [80]	Single marker	HLTF	311	CRC	Serum	I-IV				OS	KM	Stage I	0.0007							3	12.5
	Single marker	HLTF	311	CRC	Serum	I-IV				OS	KM	Stage II	0.7415							2	12.5
	Single marker	HLTF	311	CRC	Serum	I-IV				OS	KM	Stage III	0.6742							2	12.5
	Single marker	HLTF	311	CRC	Serum	I-IV				OS	KM	Stage IV	0.0005							3	12.5
	Single marker	HPP1	311	CRC	Serum	I-IV				OS	KM	Stage I	0.2629							2	12.5
	Single marker	HPP1	311	CRC	Serum	I-IV				OS	KM	Stage II	0.8687							2	12.5
	Single marker	HPP1	311	CRC	Serum	I-IV				OS	KM	Stage III	0.9258							2	12.5
	Single marker	HPP1	311	CRC	Serum	I-IV				OS	KM	Stage IV	0.0003							3	12.5
Philipp et al. 2014 [81]	Single marker	HLTF	259	CRC	Serum	I-IV				OS	KM	All stages	0.0008							3	10
	Single marker	HLTF	259	CRC	Serum	I-IV				OS	KM	Stage IV	0.0081							3	10
	Single marker	HPP1	259	CRC	Serum	I-IV				OS	KM	All stages	<0.0001							3	10
	Single marker	HPP1	259	CRC	Serum	I-IV				OS	KM	Stage IV	0.0005							3	10
Herbst et al. 2017 [82]	Single marker	HPP1	467	CRC	Plasma		Prospective		467	OS	KM, Cox			1.86	1.37	2.53	2.08	1.54	2.80	3	15
Jensen et al. 2013 [83]	Single marker	MLH1 (hMLH1)	208	CRC	PT	I-IV			208	OS	KM, Cox		0.01				0.56	0.36	0.89	1	11
Wang et al. 2014 [84]	Single marker	MLH1 (hMLH1)	433	CRC	blood	I-IV			418	OS	KM, Cox	Germline methylation					1.46	0.57	3.74	2	10
	Single marker	MLH1 (hMLH1)	433	CRC	PT	I-IV			329	OS	KM, Cox	Somatic methylation					0.70	0.32	1.53	2	10
Aoyagi et al. 2011 [85]	Multimarker	MLH1 (hMLH1), CDKN2A (p16)	134	CRC	PT	IV		2000-2003		OS	KM	RAS/RAF mutated	0.5463							2	10
	Multimarker	MLH1 (hMLH1), CDKN2A (p16)	134	CRC	PT	IV		2000-2003		OS	KM	Wildtype	0.0318							3	10
Malhotra et al. 2014 [86]	Multimarker	MLH1 (hMLH1), MSH2 ( hMSH2)	30	CRC	PT	IV	Prospective collection	2004-2006	29	OS	KM		>0.05							2	6.5
Katoh et al. 2012 [87]	Single marker	HOPX	170	CRC	PT	III			170	DSS	KM, Cox		0.037	1.35	1.02	1.81	1.40	1.02	1.92	3	9.5
Umetani et al. 2004 [88]	Single marker	ID4	92	CRC	PT	I-IV		1996-2001	76	OS	KM, Cox		0.0066	2.02	1.22	3.77	1.82	1.09	3.43	3	9.5
Fu et al. 2015 [89]	Single marker	IGFBP3	34	CRC	PT	II		1995-2009	34	RFS	KM, Cox	Cut-off 4	0.004	2.02	0.65	6.26				2	14
	Single marker	IGFBP3	34	CRC	PT	II		1995-2009	34	RFS	KM, Cox	Cut-off 10 (high-risk vs low-risk)		4.60	1.46	14.44	6.46	1.51	27.70	3	14
	Single marker	IGFBP3	81	CRC	PT	II		1995-2009	81	RFS	KM, Cox	Cut-off 4		1.50	0.71	3.18				2	14
	Single marker	IGFBP3	81	CRC	PT	II		1995-2009	81	RFS	KM, Cox	Cut-off 10 (high-risk vs low-risk)	0.034	2.21	1.04	4.68	2.40	1.10	5.25	3	14
	Single marker	IGFBP3	115	CRC	LN	II		1995-2009	115	RFS	KM, Cox	An average of 15 LNs per patient were tested	0.336							2	14
Perez-Carbonell et al. 2014 [90]	Single marker	IGFBP3	425	CRC	PT	I-IV				OS	KM, Cox	Stage II-III	0.03				0.479	0.26	0.87	3	13.5
	Single marker	IGFBP3	425	CRC	PT	I-IV				DFS		Stage II	0.02				0.28	0.12	0.70	3	13.5
	Single marker	ALX4	425	CRC	PT	I-IV															13.5
	Single marker	GAS7	425	CRC	PT	I-IV															13.5
Baba et al. 2010 [91]	Single marker	IGF2	1105	CRC	PT	I-IV	Prospective collection	1976-2004	254	CSS	Cox	Q1								2	17
	Single marker	IGF2	1105	CRC	PT	I-IV	Prospective collection	1976-2004	260	CSS	Cox	Q2		1.24	0.88	1.74	1.01	0.71	1.44	2	17
	Single marker	IGF2	1105	CRC	PT	I-IV	Prospective collection	1976-2004	264	CSS	Cox	Q3		1.02	0.72	1.44	0.97	0.66	1.42	2	17
	Single marker	IGF2	1105	CRC	PT	I-IV	Prospective collection	1976-2004	255	CSS	Cox	Q4	0.0011	1.64	1.18	2.27	1.33	0.93	1.91	2	17
	Single marker	IGF2	1105	CRC	PT	I-IV	Prospective collection	1976-2004		OS	Cox		0.0006							3	17
Moya et al. 2013 [92]	Single marker	KISS1 (KISS-1)	100	CRC	PT	II			100	recurrence	KM		0.009							3	9
	Single marker	KISS1 (KISS-1)	100	CRC	PT	II			100	metastasis	KM		0.004							3	9
	Single marker	KISS1 (KISS-1)	100	CRC	PT	II			100	DSS	KM		0.034							3	9
	Single marker	KISS1 (KISS-1)	100	CRC	PT	II			100	OS	KM		0.015							3	9
	Single marker	KISS1 (KISS-1)	190	CRC	PT	I-III			100	DSS	KM		0.030							3	9
Su et al. 2015 [93]	Single marker	LGR5	169	CRC	PT	I-IV		1999-2001		OS	KM		0.001							1	9
Shima et al. 2011 [94]	Single marker	MGMT	855	CRC	PT	I-IV	Prospective	1976-2002	855	OS	KM, Cox		0.75	0.94	0.75	1.18	1.08	0.88	1.32	2	16
	Single marker	MGMT	855	CRC	PT	I-IV	Prospective	1976-2002	855	CSS	KM, Cox		0.66	0.99	0.73	1.24	1.03	0.79	1.36	2	16
Oliver et al. 2014 [95]	Single marker	MGMT	123	CRC	PT	I-IV	Cross-sectional	2004-2009	123	OS	KM, Cox		0.398							2	12
	Single marker	MGMT	123	CRC	PT	I-IV	Cross-sectional	2004-2009	123	DFS	KM, Cox		0.949							2	12
Shannon et al. 1999 [96]	Single marker	MYOD1 (Myf-3)		CRC		II-III					KM	All tumors	0.14							2	4.5
	Single marker	MYOD1 (Myf-3)		CRC		II-III					KM	MSI- tumors	0.14							2	4.5
	Single marker	MYOD1 (Myf-3)		CRC		II-III					KM	MSI+ tumors	0.16							2	4.5
Hiranuma et al. 2004 [97]	Single marker	MYOD1	154	CRC	PT	II-III			80	OS	KM, Cox		0.007				3.16	1.25	8.02	3	9
Esteban et al. 2012 [98]	Single marker	SYNPO2 (Myopodin)	100	CRC	PT	II			100	DSS	KM		0.046							3	10
	Single marker	SYNPO2 (Myopodin)	100	CRC	PT	II			100	OS	KM		0.031							3	10
	Single marker	SYNPO2 (Myopodin)	48	CRC	PT	I-III			48	DSS	KM		0.012							3	10
	Single marker	SYNPO2 (Myopodin)	48	CRC	PT	I-III			48	OS	KM		0.009							3	10
Chaar et al. 2014 [99]	Single marker	CDKN2A (p14/ARF)	167	CRC	PT	I-IV	Retrospective	1995-2011			KM		0.41							2	8
Heitzer et al. 2014 [100]	Single marker	PCDH10	147	CRC	PT	II			143	OS	KM, Cox	5FU/LV	0.039							2	14
	Single marker	PCDH10	147	CRC	PT	II			143	OS	KM, Cox	Surveillance	<0.0001							1	14
	Single marker	PCDH10	147	CRC	PT	II			143	DFS	KM, Cox	5FU/LV	0.277							2	14
	Single marker	PCDH10	147	CRC	PT	II			143	DFS	KM, Cox	Surveillance	0.560							2	14
	Single marker	SPARC	147	CRC	PT	II			137	OS	KM, Cox	5FU/LV	0.036							1	14
	Single marker	SPARC	147	CRC	PT	II			137	OS	KM, Cox	Surveillance	0.002							1	14
	Single marker	SPARC	147	CRC	PT	II			137	DFS	KM, Cox	5FU/LV	0.132							2	14
	Single marker	SPARC	147	CRC	PT	II			137	DFS	KM, Cox	Surveillance	0.250							2	14
	Single marker	UCHL1	147	CRC	PT	II			143	OS	KM, Cox	5FU/LV	0.262							2	14
	Single marker	BAP1 (UCHL2)	147	CRC	PT	II			143	OS	KM, Cox	Surveillance	0.244							2	14
	Single marker	UCHL3	147	CRC	PT	II			143	DFS	KM, Cox	5FU/LV	0.248							2	14
	Single marker	UCHL4	147	CRC	PT	II			143	DFS	KM, Cox	Surveillance	0.199							2	14
	Multimarker	PCDH10+SPARC+UCHL1	147	CRC	PT	II			143	OS	KM, Cox	5FU/LV	0.139							2	14
	Multimarker	PCDH10+SPARC+UCHL1	147	CRC	PT	II			143	OS	KM, Cox	Surveillance	0.003							1	14
	Multimarker	PCDH10+SPARC+UCHL1	147	CRC	PT	II			143	DFS	KM, Cox	5FU/LV	0.069							2	14
	Multimarker	PCDH10+SPARC+UCHL1	147	CRC	PT	II			143	DFS	KM, Cox	Surveillance	0.031							1	14
	Single marker	FZD9	147	CRC	PT	II			143	OS	KM, Cox										14
	Single marker	SFRP1	147	CRC	PT	II			143	OS	KM, Cox										14
	Single marker	WIF1	147	CRC	PT	II			143	OS	KM, Cox										14
Pancione et al. 2010 [101]	Single marker	PPARG	152	CRC	PT	I-IV		1999-2004	152		KM		0.0001							3	11
Lin et al. 2015 [102]	Single marker	PTEN	198	CRC	PT	I-IV	Prospective	2006-2008		OS	KM, Cox			1.32	0.76	3.51	1.07	0.73	1.89	2	13.5
Miladi-Abdennadher et al. 2010 [103]	Single marker	RARB (RARß2)	73	CRC	PT	I-IV		2003-2007	33	OS	KM, Cox		0.026							3	11
	Single marker	RASSF1 (RASSF1A)	73	CRC	PT	I-IV		2003-2007	33	OS	KM, Cox									2	11
	Single marker	CDH1	73	CRC	PT	I-IV		2003-2007	33	OS	KM, Cox									2	11
	Single marker	DABK1 (DAPKise)	73	CRC	PT	I-IV		2003-2007	33	OS	KM, Cox									2	11
Chen et al. 2012 [104]	Single marker	RASSF1 (RASSF1A)	117	CRC	PT	I-IV		2001-2004		OS	Cox			1.137	0.490	2.638	1.762	0.739	4.203	2	10
	Single marker	RASSF1 (RASSF1A)	117	CRC	PT	I-IV		2001-2004		DS	Cox			1.810	0.624	5.254	2.905	0.974	8.664	2	10
Nilsson et al. 2013 [105]	Single marker	RASSF1 (RASSF1A)	111	CRC	PT	I-IV					KM, Cox									2	5
	Single marker	APC1A	111	CRC	PT	I-IV					KM, Cox									2	5
	Single marker	CDKN2A (p14/ARF)	111	CRC	PT	I-IV			106		KM, Cox		0.036							3	5
	Single marker	MGMT	111	CRC	PT	I-IV			106		KM, Cox						0.36	0.15	0.87	1	5
	Multimarker	CDKN2A (p14/ARF), RASSF1 (RASSF1A), APC1A	111	CRC	PT	I-IV			106		KM, Cox						2.20	1.05	4.62	3	5
Matthaios et al. 2016 [106]	Single marker	RASSF1 (RASSF1A)	155	CRC	Serum	Duke's A-D		2010-2014	88	OS	KM, Cox	Early operable CRC (Duke's A-C)	0.029				3.06	1.27	7.50	3	9.5
	Single marker	RASSF1 (RASSF1A)	155	CRC	Serum	Duke's A-D		2010-2014	67	OS	KM, Cox	Metastatic CRC (Duke's D)	0.002				5.76	2.44	14.82	3	9.5
	Single marker	APC	155	CRC	Serum	Duke's A-D		2010-2014	88	OS	KM, Cox	Early operable CRC (Duke's A-C)	<0.001				7.88	2.73	22.73	3	9.5
	Single marker	APC	155	CRC	Serum	Duke's A-D		2010-2014	67	OS	KM, Cox	Metastatic CRC (Duke's D)	<0.001				3.47	1.35	8.92	3	9.5
Draht et al. 2014 [107]	Single marker	RET	716	CRC	PT	I-IV		1989-1994	716	DSS	KM, Cox		0.002	1.55	1.17	2.02	1.36	0.98	1.87	3	15.5
	Single marker	RET	716	CRC	PT	I-IV		1989-1994		DSS	KM, Cox	Stage I								2	15.5
	Single marker	RET	716	CRC	PT	I-IV		1989-1994	233	OS	KM, Cox	Stage II	0.002	2.28	1.35	3.87	2.51	1.42	4.43	3	15.5
	Single marker	RET	716	CRC	PT	I-IV		1989-1994	233	DSS	KM, Cox	Stage II	0.008	2.31	1.25	4.28	2.49	1.31	4.74	3	15.5
	Single marker	RET	716	CRC	PT	I-IV		1989-1994		DSS	KM, Cox	Stage III								2	15.5
	Single marker	RET	716	CRC	PT	I-IV		1989-1994		DSS	KM, Cox	Stage IV								2	15.5
	Single marker	RET	554	CRC	PT	II-III		1996-2005	231	OS	KM, Cox	Stage II	0.504	1.20	0.73	1.97	1.16	0.71	1.92	2	15.5
	Single marker	RET	554	CRC	PT	II-III		1996-2005		OS	KM, Cox	Stage III	0.0008	2.08	1.29	3.37	2.04	1.23	3.37	3	15.5
	Single marker	RET	294	CC	PT	II		1998-2005	294	OS	KM, Cox	Stage II	0.150	1.87	1.00	3.48	1.91	1.04	3.53	3	15.5
Tham et al. 2014 [108]	Multimarker	TAC1 and/or SEPT9	150	CRC	Serum	I-III	Prospective	2003-2005	144	DFS	KM, Cox	TAC1 and/or SEPT9 (High vs Low)	0.001				4.07	1.69	9.82	3	14.5
	Multimarker	TAC1 and/or NELL1	150	CRC	Serum	I-III	Prospective	2003-2005	144	DFS	KM, Cox	TAC1 and/or NELL1 (High vs Low)	<0.001				4.84	2.00	11.67	3	14.5
	Multimarker	SEPT9 and/or NELL1	150	CRC	Serum	I-III	Prospective	2003-2005	144	DFS	KM, Cox	SEPT9 and/or NELL1 (High vs Low)									14.5
	Multimarker	TAC1 and/or SEPT9 and/or NELL1	150	CRC	Serum	I-III	Prospective	2003-2005	144	DFS	KM, Cox	TAC1 and/or SEPT9 and/or NELL1 (High vs Low)					4.67	1.81	12.04	3	14.5
	Single marker	TAC1	150	CRC	Serum	I-III	Prospective	2003-2005	144	DFS	KM, Cox	TAC1 (high vs low)		4.42	2.18	8.99	5.72	2.67	12.28	3	14.5
	Multimarker	TAC1 and/or NELL1, SEPT9 and/or NELL1	150	CRC	Serum	I-III	Prospective	2003-2005	144	DFS	KM, Cox	TAC1 and/or NELL1, SEPT9 and/or NELL1 (High vs Low)		4.32	2.07	9.01	5.39	2.45	11.85	3	14.5
	Multimarker	TAC1 and/or NELL1, SEPT9 and/or NELL1	150	CRC	Serum	I-III	Prospective	2003-2005	144	DFS	KM, Cox	TAC1 and/or NELL1, SEPT9 and/or NELL1 (High vs Low)		4.32	2.07	9.01	5.39	2.45	11.85	3	14.5
	Multimarker	TAC1 and/or SEPT9	150	CRC	Serum	I-III	Prospective	2003-2005	144	DFS	KM, Cox	TAC1 and/or SEPT9 (High vs Low)		4.86	2.05	11.54	6.92	2.66	18.04	3	14.5
	Multimarker	TAC1 and/or NELL1	150	CRC	Serum	I-III	Prospective	2003-2005	144	DFS	KM, Cox	TAC1 and/or NELL1 (High vs Low)									14.5
	Multimarker	SEPT9 and/or NELL1	150	CRC	Serum	I-III	Prospective	2003-2005	144	DFS	KM, Cox	SEPT9 and/or NELL1 (High vs Low)					2.41	1.05	5.55	3	14.5
	Multimarker	TAC1 and/or SEPT9 and/or NELL1	150	CRC	Serum	I-III	Prospective	2003-2005	144	DFS	KM, Cox	TAC1 and/or SEPT9 and/or NELL1 (High vs Low)					3.72	1.67	8.26	3	14.5
	Single marker	SEPT9	150	CRC	Serum	I-III	Prospective	2003-2005	144	DFS	KM, Cox	SEPT9 (High vs Low)	<0.001	3.62	1.76	7.46	3.50	1.67	7.32	3	14.5
	Multimarker	SEPT9 and/or NELL1	150	CRC	Serum	I-III	Prospective	2003-2005	144	DFS	KM, Cox	SEPT9 and/or NELL1 (High vs Low)	0.006	2.66	1.28	5.53	2.89	1.37	6.11	3	14.5
Liu et al. 2016 [109]	Single marker	TAC1	165	CRC	Serum	I-IV	Prospective	2003-2005	165	CSS	KM, Cox			1.15	0.67	1.97				2	15
	Single marker	TAC1	165	CRC	Serum	I-IV	Prospective	2003-2005	150	DFS	KM, Cox	Stage I-III		0.96	0.53	1.74				2	15
	Single marker	SEPT9	165	CRC	Serum	I-IV	Prospective	2003-2005	165	CSS	KM, Cox			1.02	0.59	1.74				2	15
	Single marker	SEPT9	165	CRC	Serum	I-IV	Prospective	2003-2005	150	DFS	KM, Cox	Stage I-III		0.77	0.42	1.40				2	15
	Single marker	NELL1	165	CRC	Serum	I-IV	Prospective	2003-2005	165	CSS	KM, Cox			1.19	0.68	2.07				2	15
	Single marker	NELL1	165	CRC	Serum	I-IV	Prospective	2003-2005	150	DFS	KM, Cox	Stage I-III		0.73	0.37	1.44				2	15
	Single marker	EYA4	165	CRC	Serum	I-IV	Prospective	2003-2005	165	CSS	KM, Cox			1.24	0.73	2.12				2	15
	Single marker	EYA4	165	CRC	Serum	I-IV	Prospective	2003-2005	150	DFS	KM, Cox	Stage I-III		1.18	0.65	2.15				2	15
	Single marker	CRABP1	165	CRC	Serum	I-IV	Prospective	2003-2005	165	CSS	KM, Cox			1.10	0.64	1.87				2	15
	Single marker	CRABP1	165	CRC	Serum	I-IV	Prospective	2003-2005	150	DFS	KM, Cox	Stage I-III		1.15	0.63	2.10				2	15
	Single marker	MAL	165	CRC	Serum	I-IV	Prospective	2003-2005	165	CSS	KM, Cox			2.26	1.29	3.96				3	15
	Single marker	MAL	165	CRC	Serum	I-IV	Prospective	2003-2005	150	DFS	KM, Cox	Stage I-III		1.15	0.63	2.09				2	15
	Single marker	SST	165	CRC	Serum	I-IV	Prospective	2003-2005	165	CSS	KM, Cox		0.002	2.40	1.35	4.28	1.96	1.06	3.62	3	15
	Single marker	SST	165	CRC	Serum	I-IV	Prospective	2003-2005	124	CSS	KM, Cox	Stage II & III	0.003				2.797	1.34	5.84	3	15
	Single marker	SST	165	CRC	Serum	I-IV	Prospective	2003-2005	62	CSS	KM, Cox	Stage II	0.08							2	15
	Single marker	SST	165	CRC	Serum	I-IV	Prospective	2003-2005	62	CSS	KM, Cox	Stage III	0.044				2.52	1.02	6.25	3	15
	Single marker	SST	165	CRC	Serum	I-IV	Prospective	2003-2005	150	DFS	KM, Cox	Stage I-III	0.005	2.40	1.27	4.55	2.60	1.37	4.94	3	15
	Single marker	SST	165	CRC	Serum	I-IV	Prospective	2003-2005	124	DFS	KM, Cox	stage II & III	0.018				2.15	1.12	4.12	3	15
	Single marker	SST	165	CRC	Serum	I-IV	Prospective	2003-2005	62	DFS	KM, Cox	Stage II	0.314							2	15
	Single marker	SST	165	CRC	Serum	I-IV	Prospective	2003-2005	62	DFS	KM, Cox	Stage III	0.075							2	15
Dallol et al. 2012 [110]	Multimarker	SFRP1, SLIT2, HIC1, MYOD1, RASSF1A, APC, MGMT	120	CRC	PT		Retrospective	2005-2009	36	DFS	KM, Cox	Group I (low methylation)	0.073							2	10
	Multimarker	SFRP1, SLIT2, HIC1, MYOD1, RASSF1A, APC, MGMT	120	CRC	PT		Retrospective	2005-2009	67	DFS	KM, Cox	Group II (PCG methylation)	0.027				0.269	0.095	0.761	1	10
	Multimarker	SFRP1, SLIT2, HIC1, MYOD1, RASSF1A, APC, MGMT	120	CRC	PT		Retrospective	2005-2009	17	DFS	KM, Cox	Group III (high methylation)	0.058							2	10
Tang et al. 2011 [111]	Single marker	SFRP2	308	CRC	PT	I-IV			77	OS	KM, Cox		0.0216				3.06	1.12	8.40	3	10
	Single marker	SFRP2	308	CRC	Stool	I-IV			77	OS	KM, Cox		0.0219				2.17	1.00	4.74	3	10
	Single marker	SFRP2	308	CRC	Serum	I-IV			77	OS	KM, Cox		0.0255				1.81	1.07	3.09	3	10
Tsai et al. 2015 [112]	Single marker	SHISA3	127	CRC	PT	I-IV		1997-2003	120	OS	KM, Cox		<0.001							3	13
	Single marker	SHISA3	127	CRC	PT	I-IV		1997-2003	83	OS	KM, Cox	Stage II-III					2.9	1.5	5.8	3	13
	Single marker	SHISA3	127	CRC	PT	I-IV		1997-2003	83	DFS	KM, Cox	Stage II-III	0.006				4.0	1.6	10.2	3	13
	Single marker	SHISA3	127	CRC	PT	I-IV		1997-2003		DFS	KM, Cox	Stage II					7.2	1.6	31.5	3	13
	Single marker	SHISA3	127	CRC	PT	I-IV		1997-2003		DFS	KM, Cox	Stage III								2	13
He et al. 2017 [113]	Single marker	SLFN11	128	CRC	PT	T1-4		2009-2013	128	OS	KM, Cox		0.023	0.457	0.227	0.923	0.439	0.217	0.887	3	10.5
	Single marker	SLFN11	128	CRC	PT	T1-4		2009-2013	128	RFS	KM, Cox		0.023	0.461	0.229	0.93	0.442	0.219	0.891	3	10.5
Kang et al. 2016 [114]	Single marker	SOCS-1	97	CRC	PT	I-II/Duke's A-B			97	OS	KM		0.004							3	8.5
Yang et al. 2013 [115]	Single marker	SYK (Syk)	210	CRC	PT	I-IV				OS	KM, Cox		<0.0001				1.766	1.139	3.568	3	7.5
Yu et al. 2010 [116]	Single marker	TBX5	105	CC	PT	I-IV			80	OS	KM, Cox		<0.001	6.21	2.39	16.2	5.42	2.06	14.4	3	9
Zhang et al. 2014 [117]	Single marker	TFAP2E	311	CRC	PT	I-IV		2005-2007	311	OS	KM, Cox		<0.0001				0.486	0.342	0.692	1	10.5
Park et al. 2015 [118]	Single marker	TFPA2E	193	CRC	PT	I-III		2004		OS	KM, Cox		0.083	1.84	0.91	3.70	2.24	1.10	4.56	1	14
	Single marker	TFPA2E	193	CRC	PT	I-III		2004		OS	KM, Cox	Stage II or III resected CRCs who were treated with adjuvant (n=154);		1.95	0.92	4.133	2.55	1.19	5.50	1	14
	Single marker	TFPA2E	193	CRC	PT	I-III		2004		RFS	KM, Cox		0.063	2.04	0.95	4.39	2.44	1.12	5.32	1	14
	Single marker	TFPA2E	193	CRC	PT	I-III		2004		RFS	KM, Cox	Stage II or III resected CRCs who were treated with adjuvant (n=154)		1.72	0.80	3.71	2.36	1.08	5.18	1	14
Beggs et al. 2015 [119]	Single marker	TFAP2E	96	CRC	PT				96	OS	KM	CpG1 hypermethylated	0.844	1.08	0.43	2.83				2	5
	Single marker	TFAP2E	96	CRC	PT				96	OS	KM	CpG2 hypomethylated	0.044	0.34	0.12	0.97				1	5
	Single marker	TFAP2E	96	CRC	PT				96	DFS	KM	CpG1 hypermethylated	0.818	0.90	0.37	2.17				2	5
	Single marker	TFAP2E	96	CRC	PT				96	DFS	KM	CpG2 hypomethylated	0.046	0.40	0.16	0.98				1	5
Ruppenthal et al. 2011 [120]	Single marker	TWIST1	73	CRC	PT	I-IV	Prospective collection			OS	KM									2	9.5
Abdelmaksoud-Dammak et al. 2014 [121]	Single marker	WIF1	83	CRC	PT	I-IV		2003-2007	40	OS	KM		0.024							3	9
Rawson et al. 2011 [122]	Single marker	WNT5a	545	CRC	PT	I-IV		1997-2000		RFS	KM, Cox						1.00	0.6	1.7	2	12.5
	Single marker	WNT5a	687	CRC	PT	I-IV		1999-2003		RFS	KM, Cox						0.9	0.6	1.3	2	12.5
N = Number
CRC = Colorectal cancer
CC = Colon cancer
PT = primary tissue
LN = lymph node
DFS = Disease-free survival
OS = Overall survival
LRFS = Local recurrence-free survival
DRFS = Distant recurrence-free survival
DS = Disease-specific survival
RFS = Recurrence-free survival
PFS = Progression-free survival
CSS = Cancer-specific survival
KM = Kaplan Meier alysis
Cox = Cox regression alysis
U = unmethylated
M = methylated
MSS = Microsatellite stable
MSI = Microsatellite instable
PCG = Polycomb group
Category 1: marker significantly associated with favorable prognosis
Category 2: no significant association between marker and prognosis
Category 3: marker significantly associated with poorer prognosis
